# Supplementary material for: Laser Cutting Coupled with Electro-Exfoliation to Prepare Versatile Planar Graphene Electrodes for Energy Storage
Source: MDPI journal article supplement (doi:10.3390/ijms24065599), 2023-03-15
Supplement: s1 [file s1]

## Supplementary data

### Laser Cutting Coupled with Electro-exfoliation to Prepare Versatile Planar Graphene Electrodes for Energy Storage

Jianren Wang <sup>1,2</sup>, Tianshuo Yang <sup>2</sup>, Neus Vila <sup>1</sup> and Alain Walcarius <sup>1,\*</sup>

<sup>1</sup> *Université de Lorraine, CNRS, Laboratoire de Chimie Physique et Microbiologie pour les Matériaux et l'Environnement (LCPME), F-54000 Nancy, France; wangjr@ysu.edu.cn (J.W.); neus.vila@univ-lorraine.fr (N.V.)*

<sup>2</sup> *Key Laboratory of Applied Chemistry, School of Environmental and Chemical Engineering, Yanshan University, Qinhuangdao 066004, China*

\* *Correspondence: alain.walcarius@univ-lorraine.fr; Tel.: +33-3-72-74-73-75*

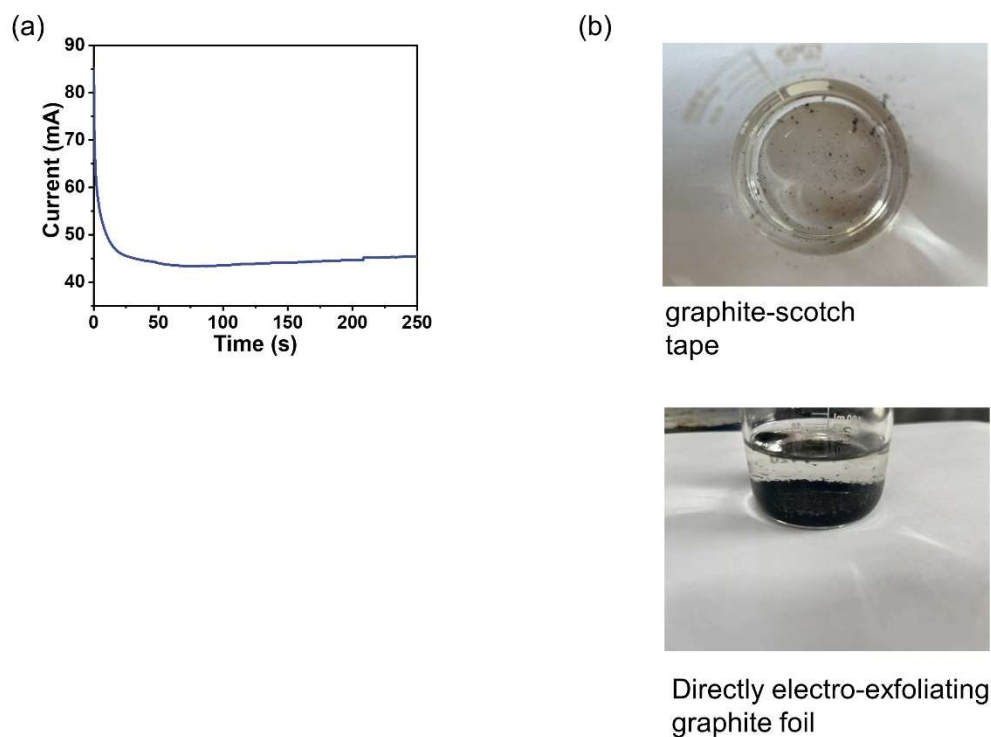

**Figure S1** (a) a typical exfoliation current for a piece of graphite foil; (b) Respective photographs of the final solution that exfoliates graphite-scotch tape and a piece of graphite under a same condition.

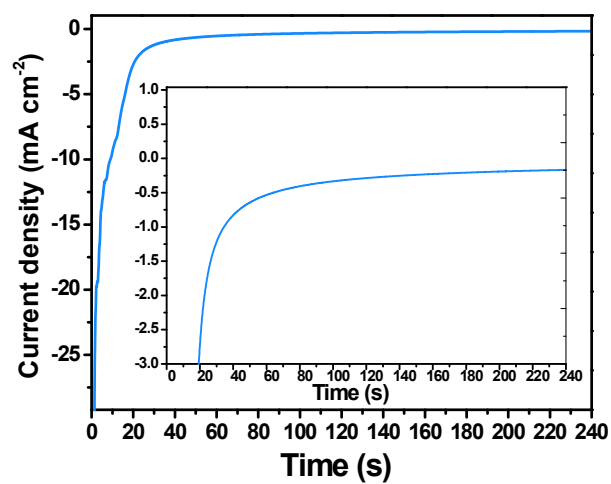

**Figure S2** the activation current profile of the G-240 at the potential of 0V for 240s.

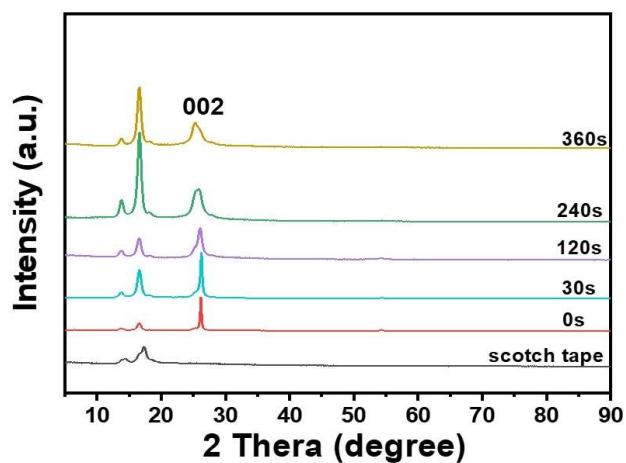

**Figure S3** the XRD pattern of the set of graphite samples exfoliated at various times.

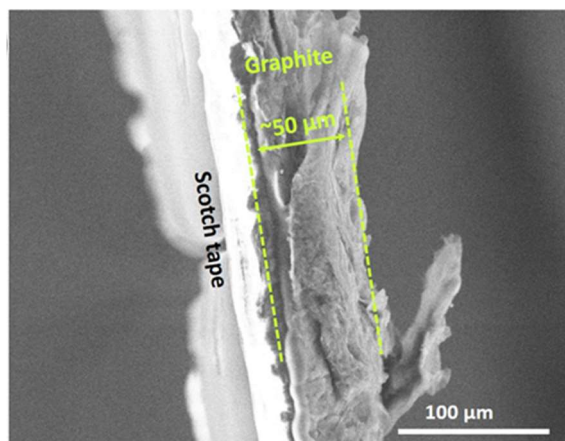

**Figure S4** the cross-section SEM view of the original graphite/scotch tape electrode.

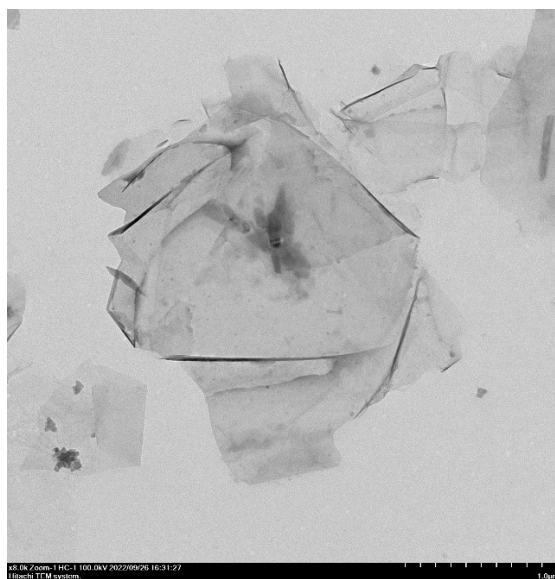

**Figure S5** the TEM image of the G-240.

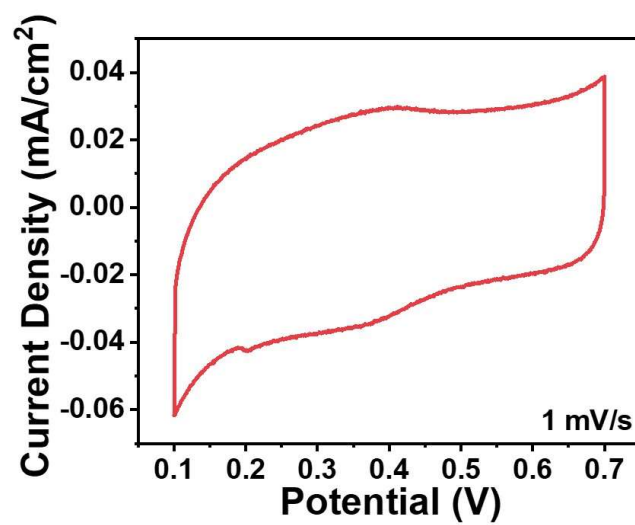

**Figure S6** the CV curve of the G-240 at a scan rate of  $1 \text{ mV s}^{-1}$  in  $1 \text{ M H}_2\text{SO}_4$  with a reference of  $\text{Ag/AgCl (3 M)}$ .

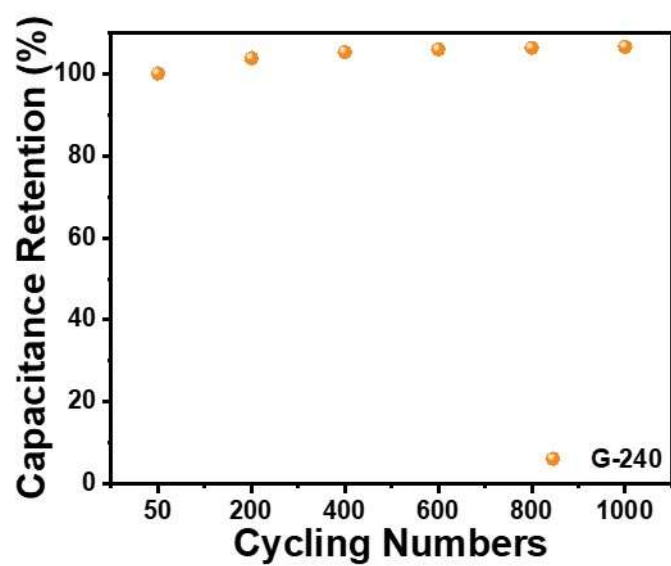

**Figure S7** the cycling performance of G-240 at a scan rate of  $100 \text{ mV s}^{-1}$ .

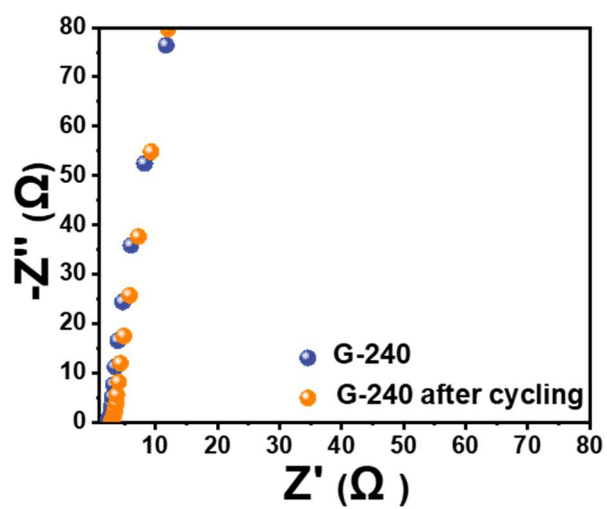

**Figure S8** the impedance spectra of G-240 and G-240 after long-term cycling at OCP in the frequency range from 100 kHz to 0.1 Hz.

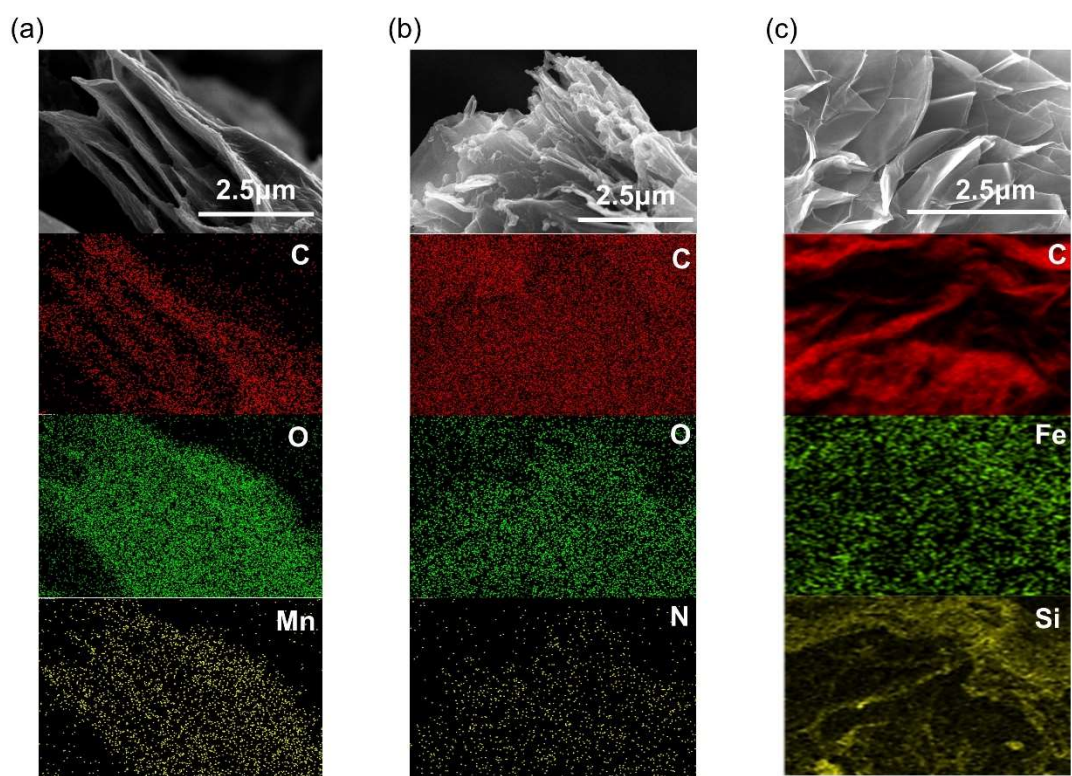

**Figure S9** the corresponding elements mapping results of (a)  $\text{MnO}_2$ , (b) PANI, and (c) Fc-MS functionalized samples to show their homogeneous distribution.

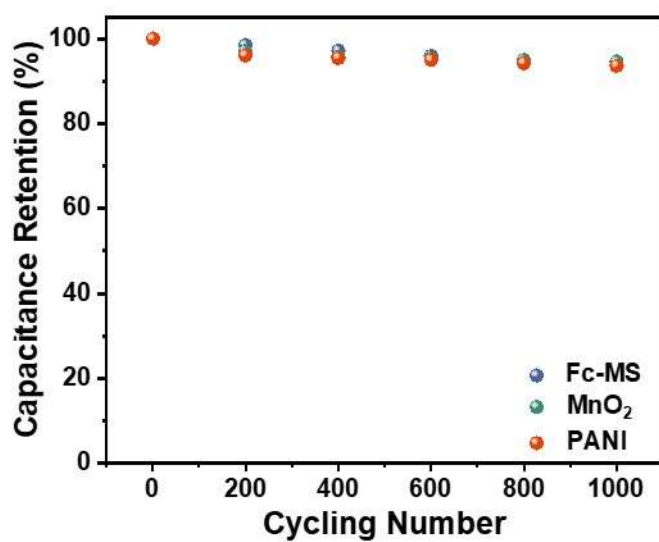

**Figure S10** the cycling performance of Fc-MS,  $\text{MnO}_2$ , and PANI at a scan rate of  $100 \text{ mV s}^{-1}$ .

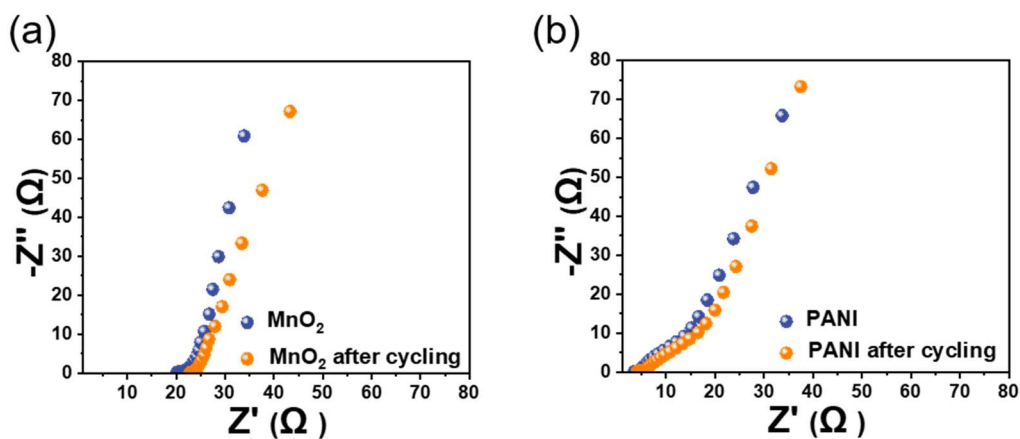

**Figure S11** the impedance spectra of MnO<sub>2</sub> (a) and PANI (b) before and after long-term cycling at OCP in the frequency range from 100 kHz to 0.1 Hz.

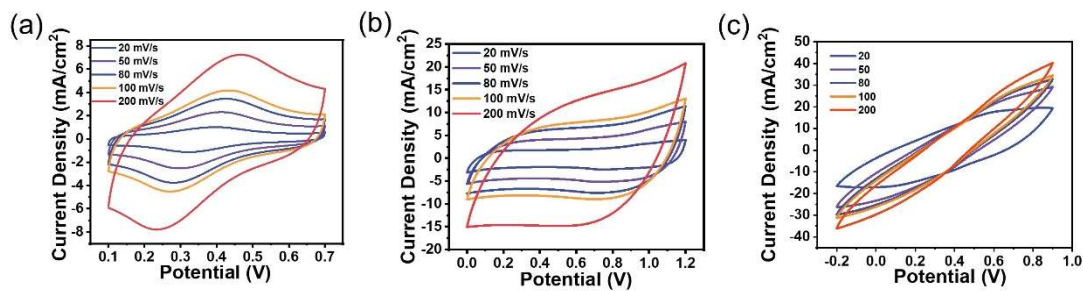

**Figure S12** the CV curves of Fc-MS (a), MnO<sub>2</sub> (b), and PANI (c) at scan rates ranging from 20 mV s<sup>-1</sup> to 200 mV s<sup>-1</sup> (vs. Ag/AgCl 3 M).

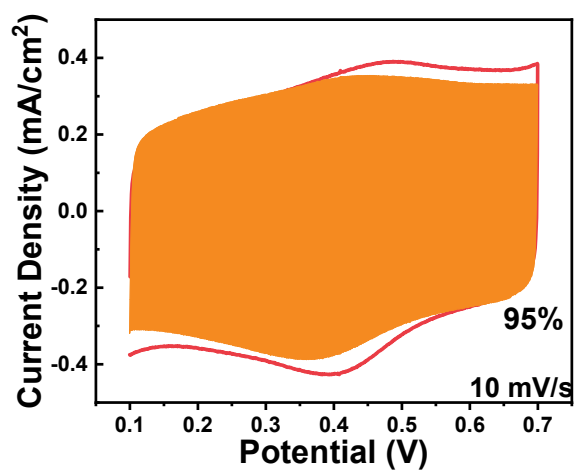

**Figure S13** the surface-controlled current ratio of G-240 at a scan rate of 10 mV s<sup>-1</sup>.

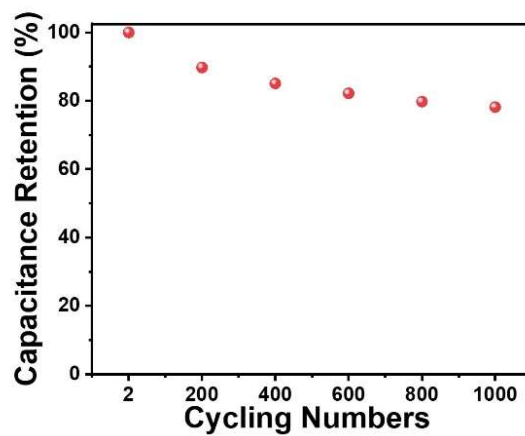

**Figure S14** the cycling performance of the PANI symmetrical device.

**Table S1** the impedance fitting parameters of the graphite, G-240, and G-240 before activation.

| Samples                 | $R_s/\Omega$ | $Q_1/F*s^{(a1)}$ | $a_1$  | $R_{ct}/\Omega$ | $s_2/\Omega*s^{(-0.5)}$ | Equivalent circuits |
|-------------------------|--------------|------------------|--------|-----------------|-------------------------|---------------------|
| graphite                | 0.7048       | 0.06246          | 1      |                 | 16.18                   |                     |
| G-240                   | 2.216        | 0.02161          | 0.9831 |                 | 2.679                   |                     |
| G-240 before activation | 1145         | $7.654*10^{-5}$  | 0.3253 | 7703            | $6.547*10^{-12}$        |                     |
